# Supplementary material
Source: Springer Nature journal article supplement (https://www.springermedizin.de/resource/supplementary/12889_2014_7033_MOESM2_ESM.pdf/9499752)
Supplement: MOESM2 [file 9499752]

## File 2: Variables recoded

| Variable name                     | Question                                                                           | Variable recoding                                                                                               |
|-----------------------------------|------------------------------------------------------------------------------------|-----------------------------------------------------------------------------------------------------------------|
| Breakfast intake                  | Do you usually have breakfast: everyday, sometimes, I don't                        | Yes, No (sometimes and I don't coded as 'No')                                                                   |
| Number of snacks per day          | How many snacks do you have a day: once, twice, 3 or more                          | Once or twice, 3 or more                                                                                        |
| Eating out                        | How many times a week do you eat out: once or twice, 3 or more, never              | Sometimes, 3 or more (never and once or twice coded as "sometimes")                                             |
| Eating in front of TV             | Do you eat in front of TV: yes, sometimes, No                                      | Yes, No (sometimes and No coded as "No")                                                                        |
| TV viewing during week days       | Do you watch TV during weekdays: a little, a lot, No                               | Yes, No (a lot coded as "yes", a little and no coded as "No")                                                   |
| TV viewing during week ends       | Do you watch TV during weekends: all day, once, twice, No                          | A lot, a little (all day and twice a day coded as "a lot", once a day and no, coded as "a little")              |
| Electronic games during week days | Do you play computer games during weekdays: a little, a lot, 3 times a week, No    | Everyday, not everyday (a little and a lot coded as "everyday", 3 times a week and no, coded as "not everyday") |
| Electronic games during week ends | Do you play computer games during weekends: once a day, twice a day, all day, No   | A lot, a little (all day and twice a day coded as "a lot", once a day and no coded as "a little")               |
| Physical activity during recess   | What do you play during recess: ball games, jumping rope, running games, You don't | Play, don't play (ball games, jumping rope and running games coded as "play")                                   |
| Physical activity at home         | What do you play at home: ball games, rollers, bicycle, you don't                  | Play, don't play (ball games, rollers and bicycle coded as "play")                                              |
| After school physical activity    | How many times a week you do sports after school: once, twice, 3 or more, No       | No, At least once (once, twice and 3 or more coded as "at least once per week")                                 |
| Health belief (1)                 | The food you eat can affect your health: yes, no, don't know                       | Yes, No (don't know and No coded as 'No')                                                                       |
| Health belief (2)                 | The foods you eat now are healthy: yes, no, don't know                             | Yes, No (don't know and No coded as 'No')                                                                       |
| Health belief (3)                 | People who weigh more may have health problems: yes, no, don't know                | Yes, No (don't know and No coded as 'No')                                                                       |
